# Supplementary material for: Preparation of miscible CdS and homojunction C3N4 hybrids for efficient photocatalytic degradation of tetracycline
Source: Royal Society of Chemistry journal article supplement (doi:10.1039/d2nj01854c), 2022-01-01
Supplement: d2nj01854c39.pdf [file d2nj01854c39.pdf]

---

## Supporting Information

---

### **Preparation of miscible CdS and homojunction C<sub>3</sub>N<sub>4</sub> hybrids for efficient photocatalytic degradation of tetracycline**

Ying Liu<sup>a†</sup>, Xianpeng Zeng<sup>a†</sup>, Jun Han<sup>a</sup>, Zongju Tian<sup>a</sup>, Feifan Yu<sup>a</sup>, Wei Wang<sup>a,b\*</sup>

a.Key Laboratory for Green Processing of Chemical Engineering of Xinjiang Bingtuan,  
School of Chemistry and Chemical Engineering, Shihezi University, Shihezi 832003, P.R.  
China

b.Carbon Neutralization and Environmental Catalytic Technology Laboratory, Shihezi  
University, Shihezi 832003, P.R. China

†These authors contributed equally to this work.

\*Corresponding author: Wei Wang. E-mail: wangw@shzu.edu.cn

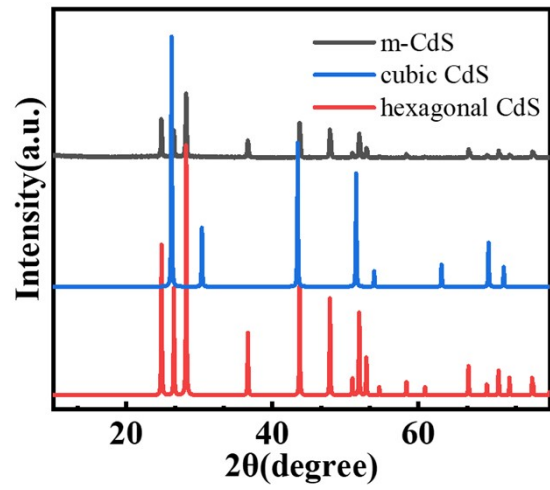

**Fig.S1 XRD of m-CdS, cubic CdS, hexagonal CdS**

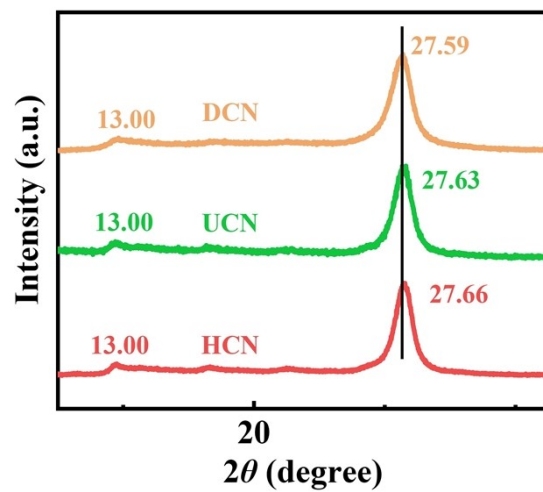

Fig.S2 XRD of DCN, UCN, HCN

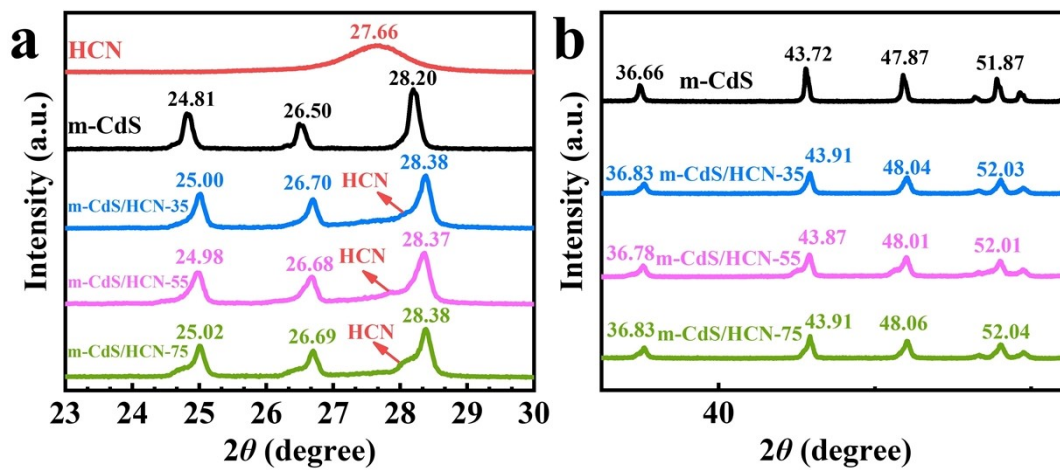

Fig.S3 Enlarged XRD of HCN, m-CdS and m-CdS/HCN samples(a-b)

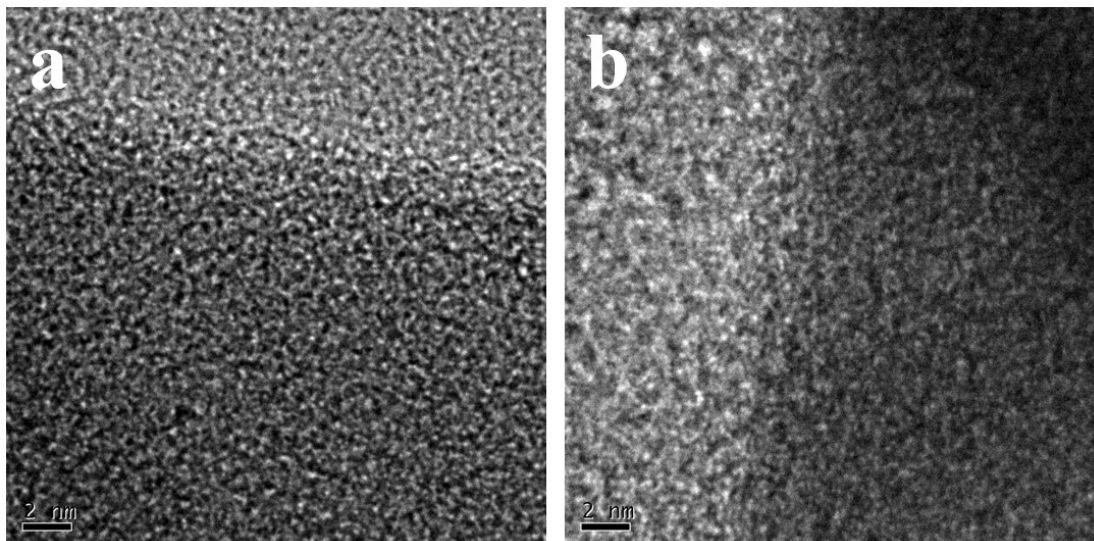

**Fig.S4 TEM of HCN(a-b)**

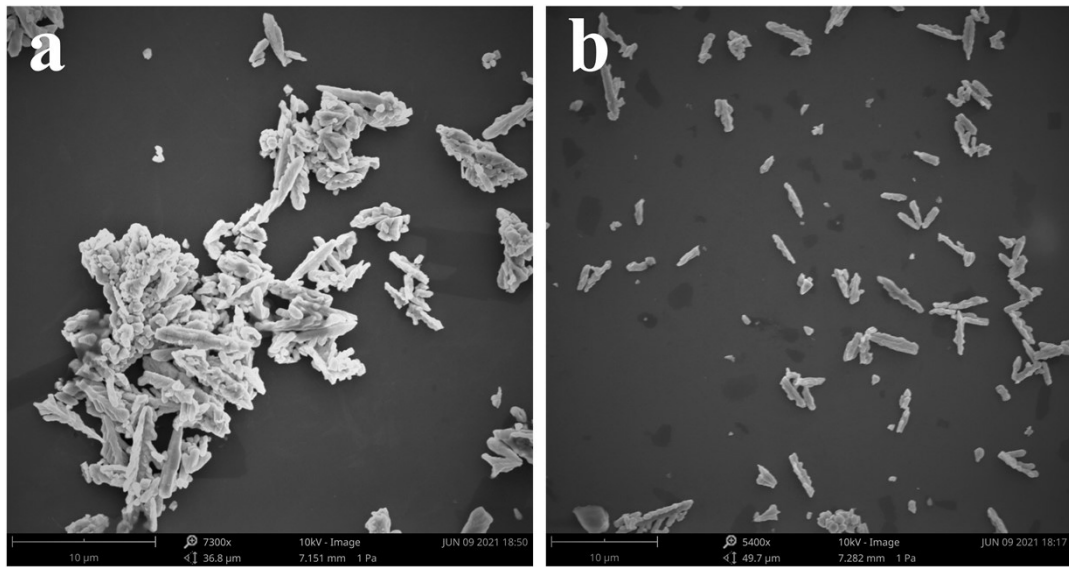

**Fig.S5 SEM of (a) bulk m-CdS, (b) cypress leaves-like m-CdS nanoparticles**

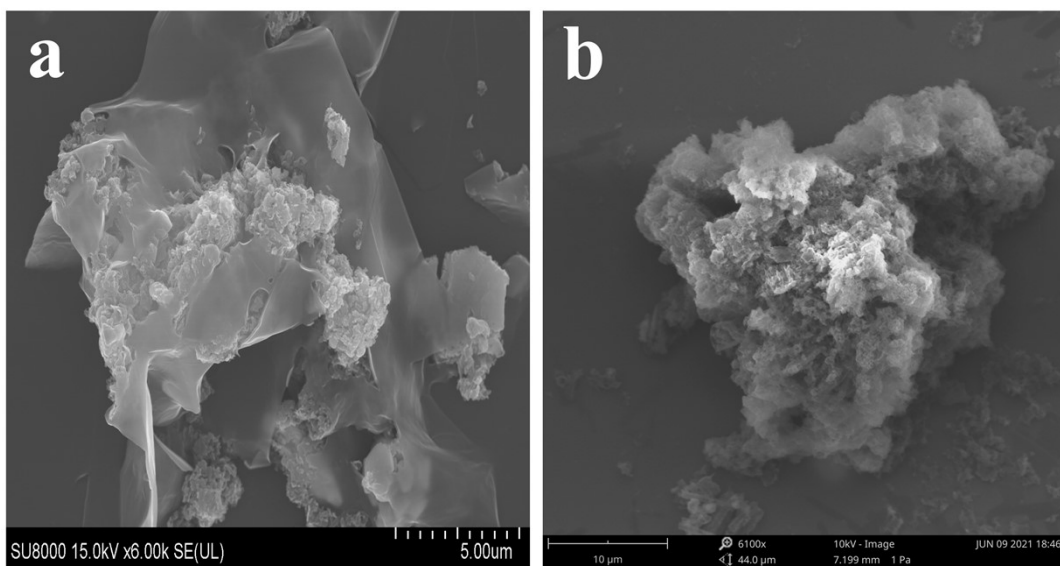

**Fig.S6 SEM of (a) bulk HCN, (b) HCN nanosheets**

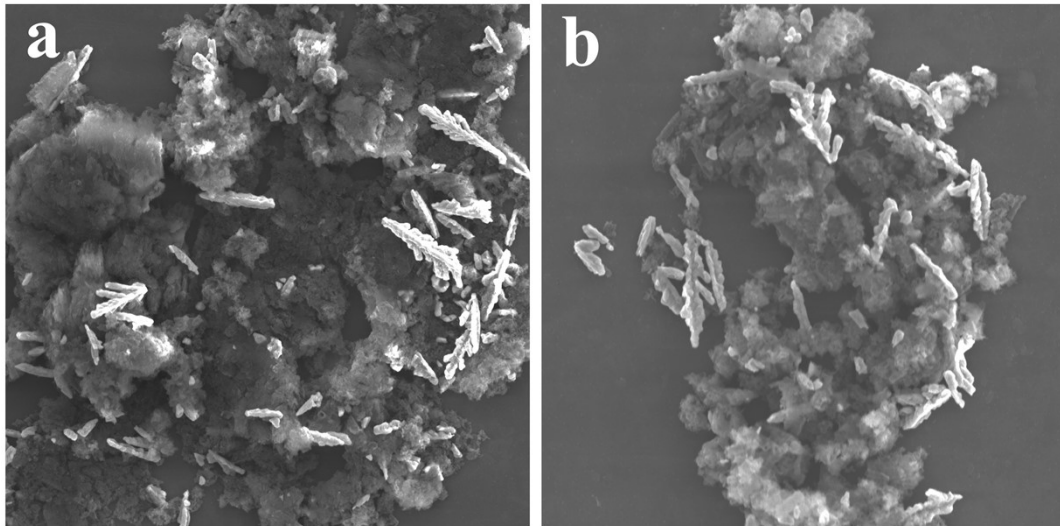

**Fig.S7 SEM of m-CdS@HCN-55(a-b)**



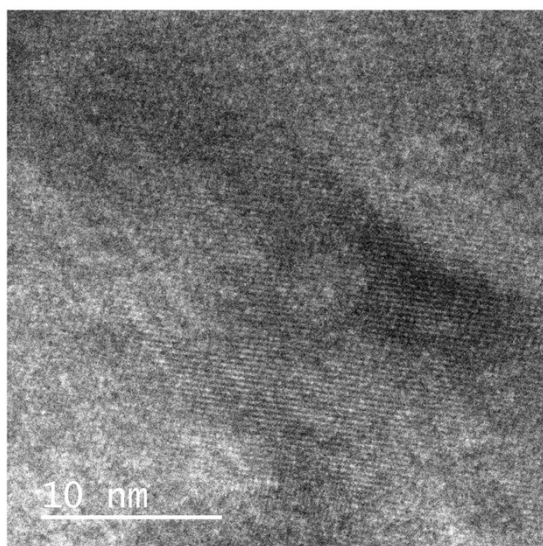

**Fig.S8 HRTEM of m-CdS/HCN-55**

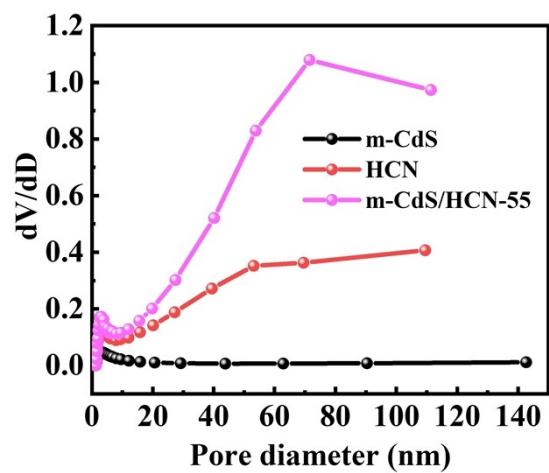

Fig.S9 The pore size distribution of m-CdS, HCN, m-CdS/HCN-55

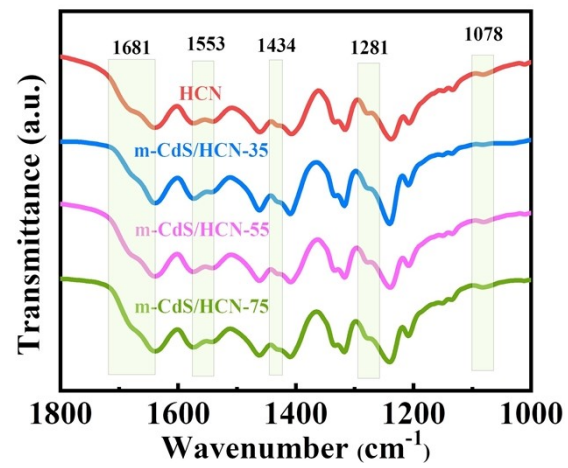

Fig.S10 Enlarged FTIR

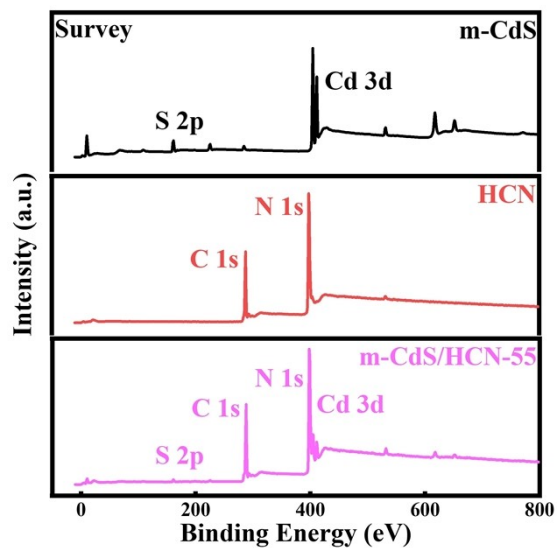

Fig.S11 Survey XPS spectra of m-CdS, HCN, m-CdS/HCN-55

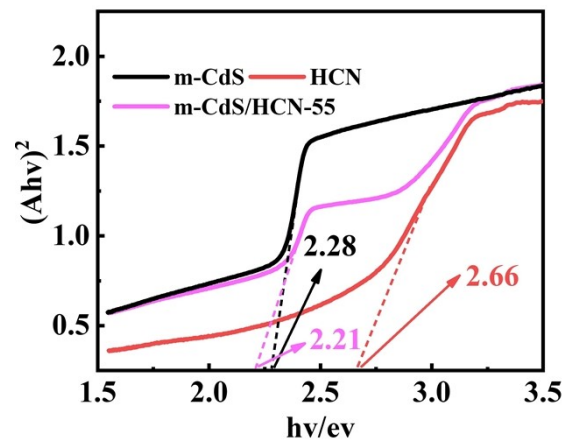

Fig.S12 DRS converted spectra of m-CdS, HCN, m-CdS/HCN-55

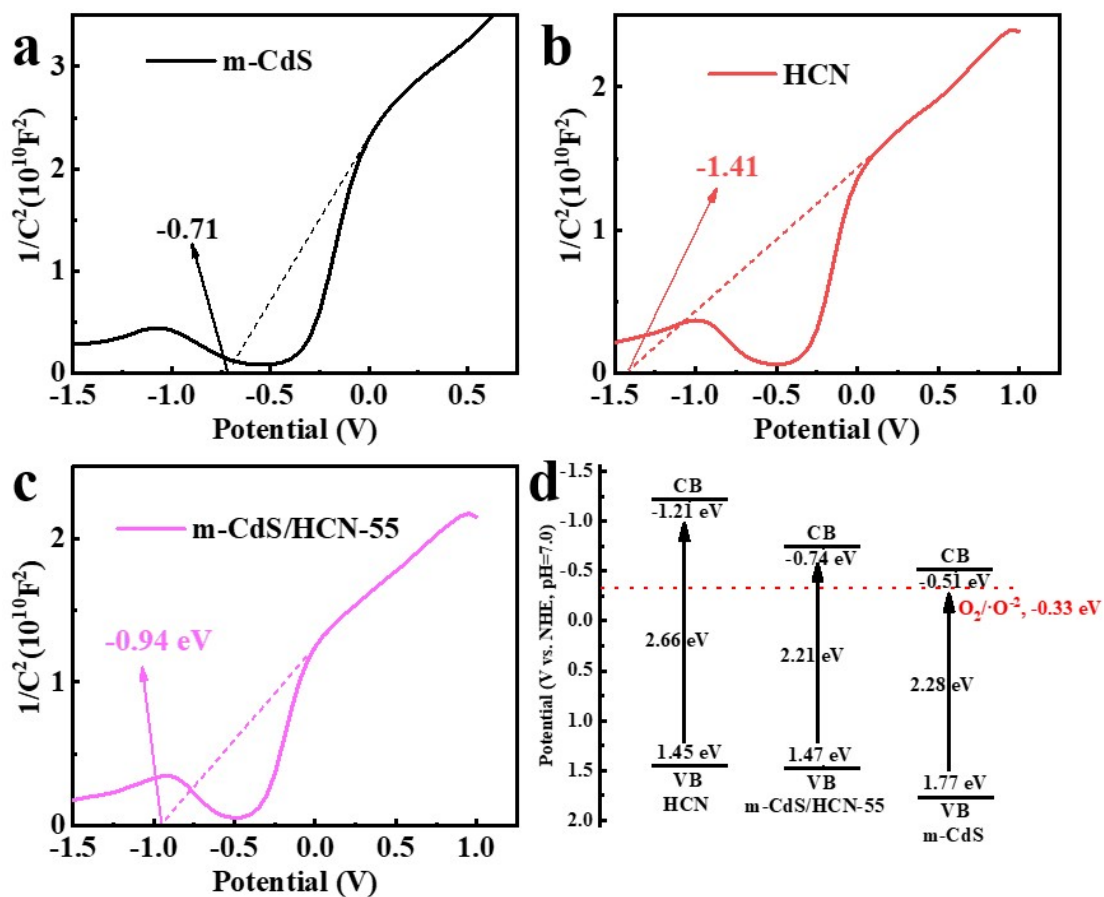

Fig.S13 Mott- Schottky plots of (a) m-CdS, (b) HCN, (c) m-CdS/HCN-55, and (d) band structures of m-CdS, HCN, m-CdS/HCN-55

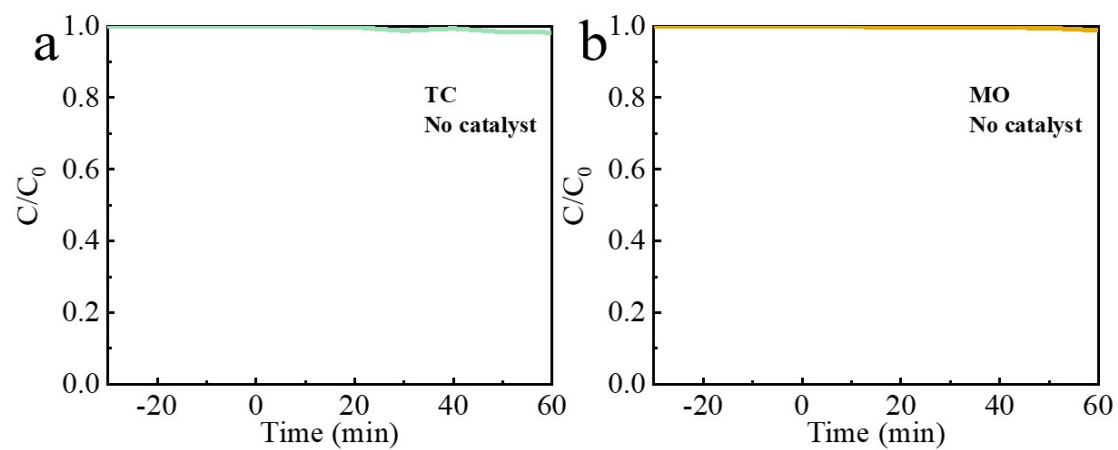

**Fig.S14 Blank control experiment of pure TC and MO under light**

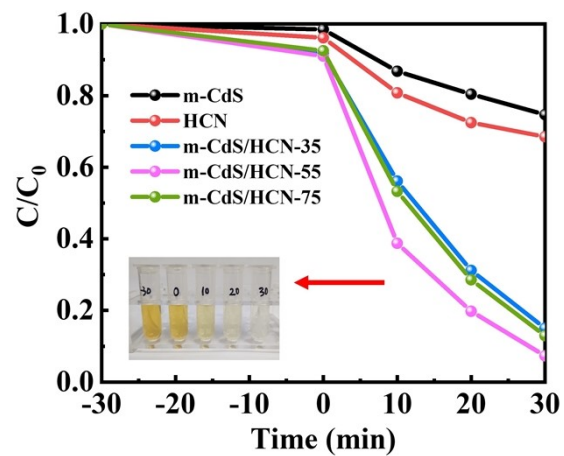

Fig.S15 Photocatalytic MO degradation performance of different catalysts



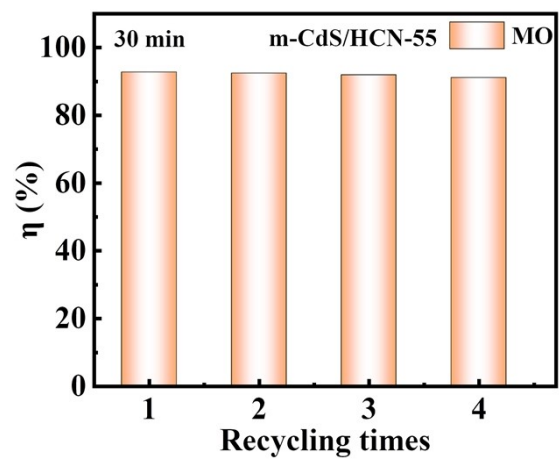

**Fig.S16** Four-cycle test of m-CdS/HCN-55 for MO photodegradation

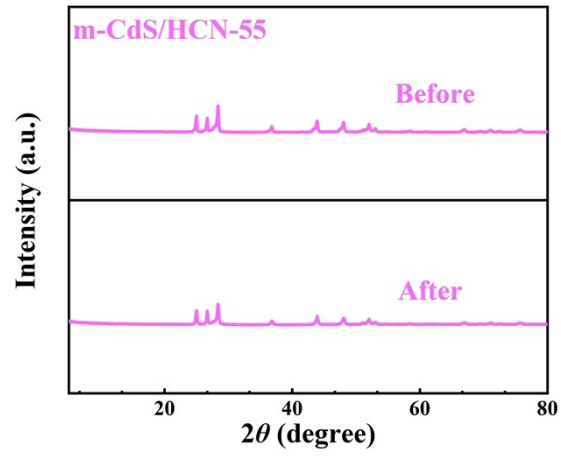

**Fig.S17 XRD patterns of m-CdS/HCN-55 before and after TC degradation**

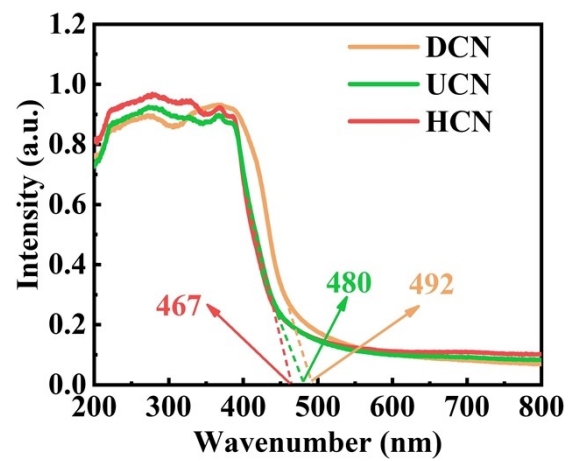

Fig.S18 UV-vis DRS of DCN, UCN, HCN

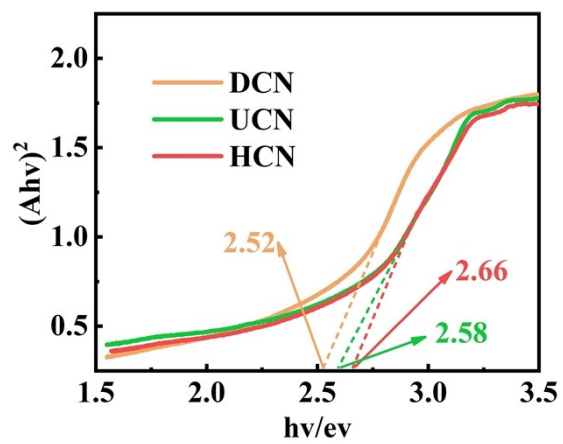

Fig.S19 DRS converted spectra of DCN, UCN, HCN

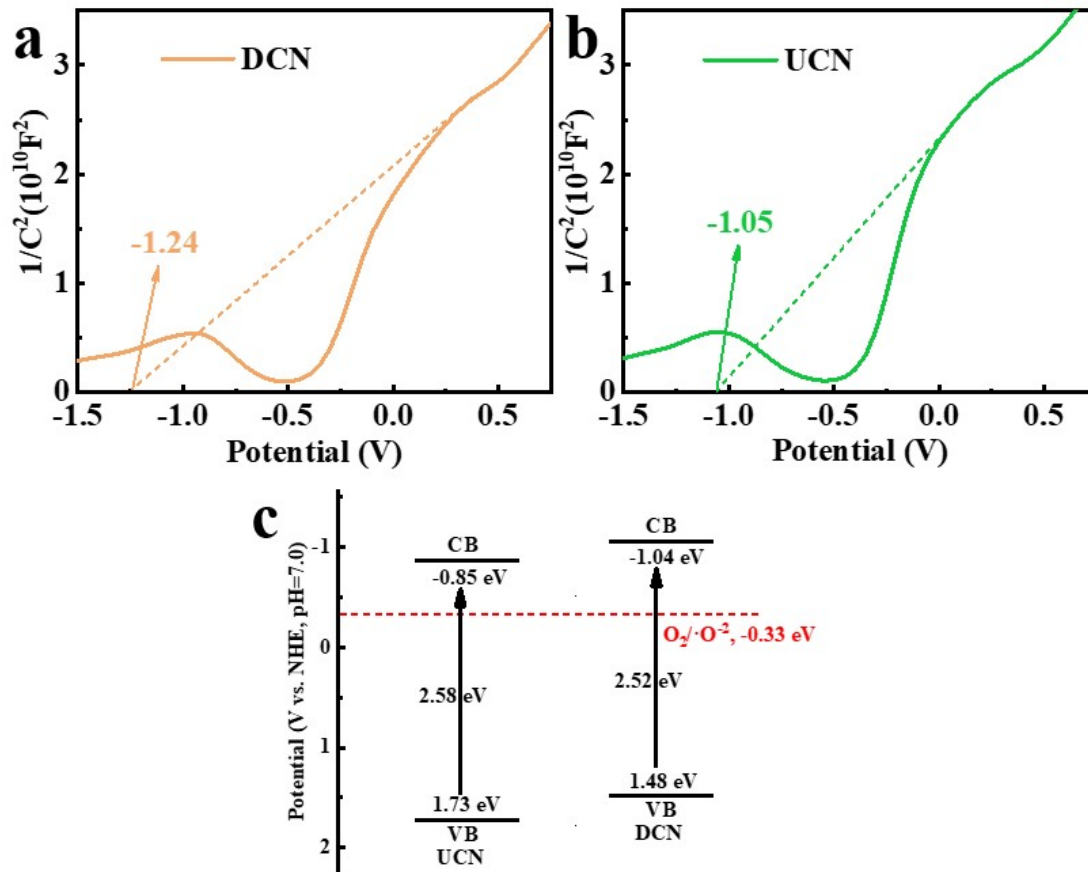

Fig.S20 Mott- Schottky plots of (a) DCN, (b) UCN, and band structures of DCN, UCN

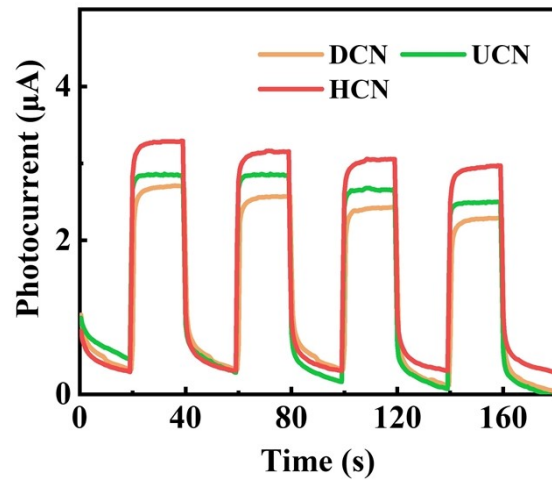

**Fig.S21** Transient photocurrent response of DCN, UCN, HCN

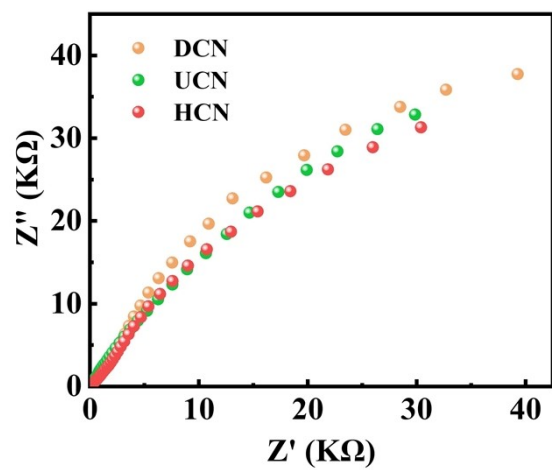

**Fig.S22 EIS Nyquist plots of DCN, UCN, HCN**

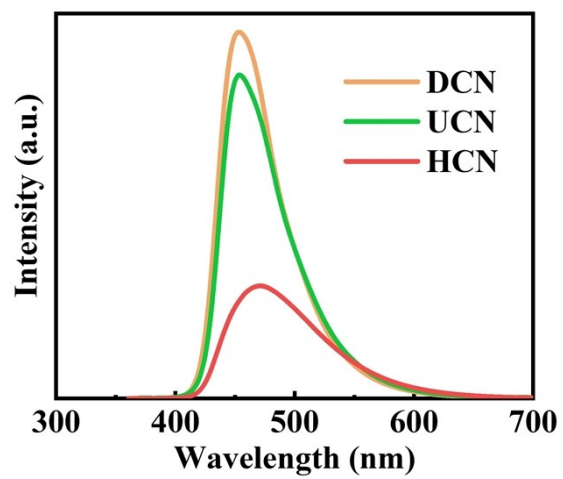

Fig.S23 PL spectra of DCN, UCN, HCN



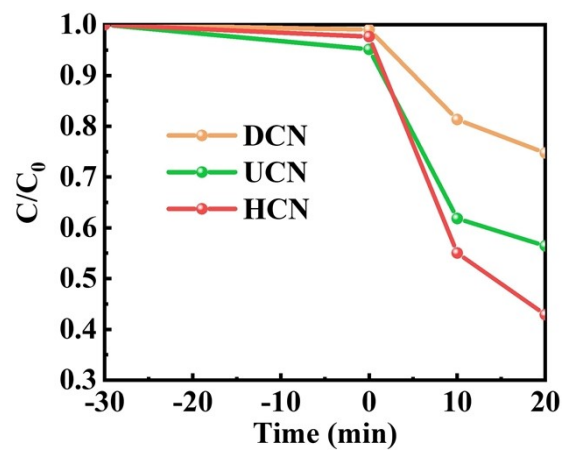

**Fig.S24 Photocatalytic performance of DCN, UCN and HCN for TC degradation**

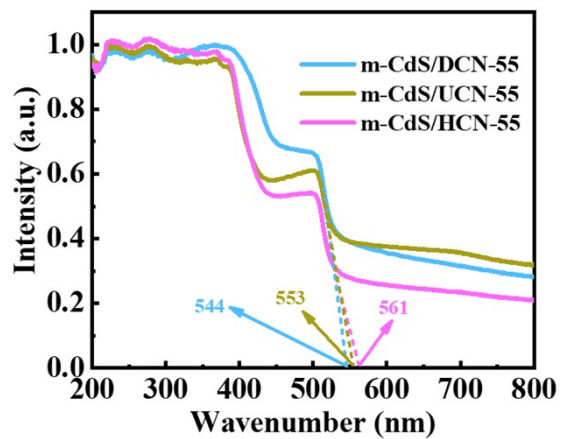

Fig.S25 UV-vis DRS of m-CdS/DCN-55, m-CdS/UCN-55, m-CdS/HCN-55

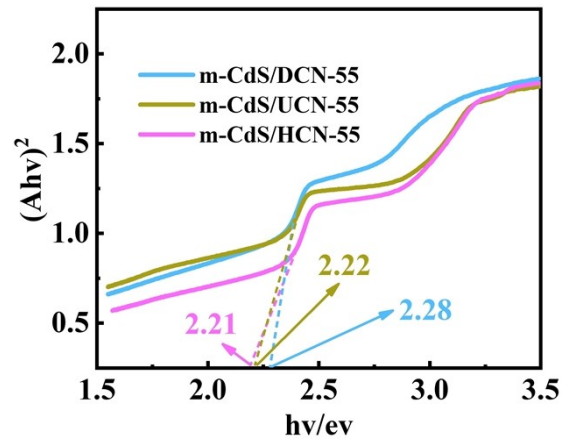

Fig.S26 DRS converted spectra of m-CdS/DCN-55, m-CdS/UCN-55, and m-CdS/HCN-

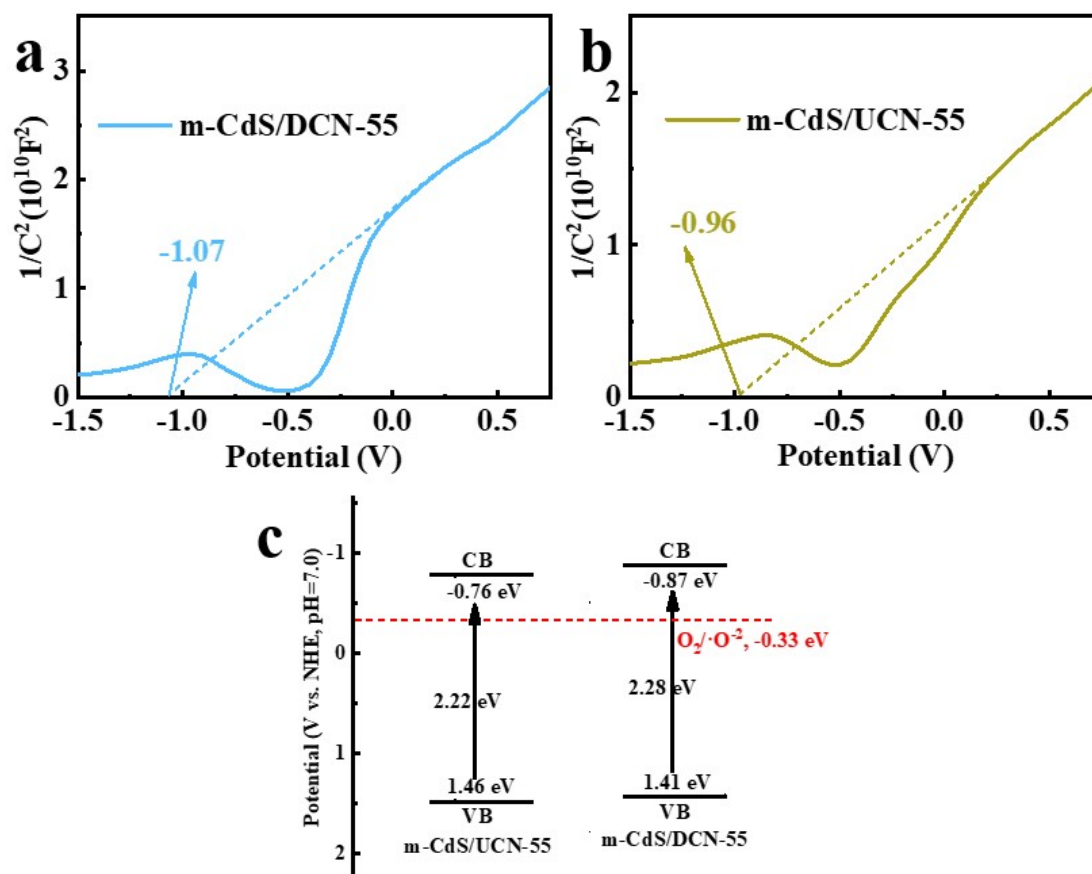

Fig.S27 Mott- Schottky plots of (a) m-CdS/DCN-55, (b) m-CdS/UCN-55, and band structures of m-CdS/DCN-55, m-CdS/UCN-55

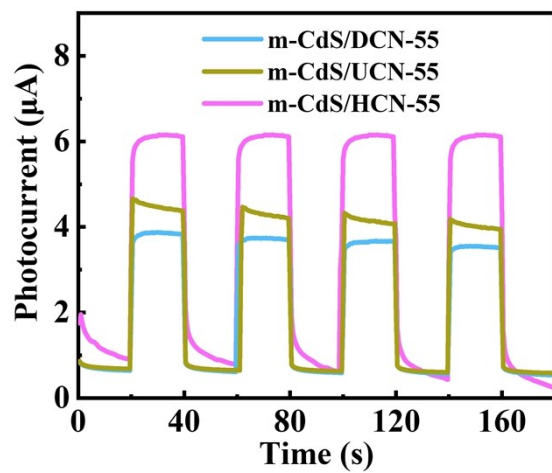

**Fig.S28** Transient photocurrent response of m-CdS/DCN-55, m-CdS/UCN-55, m-CdS/HCN-55

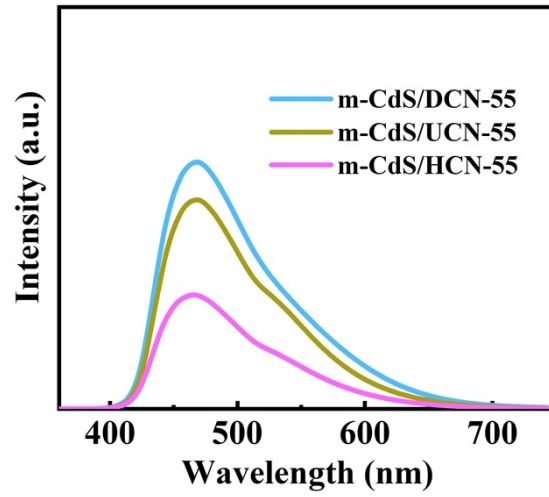

Fig.S29 PL spectra of m-CdS/DCN-55, m-CdS/UCN-55, m-CdS/HCN-55

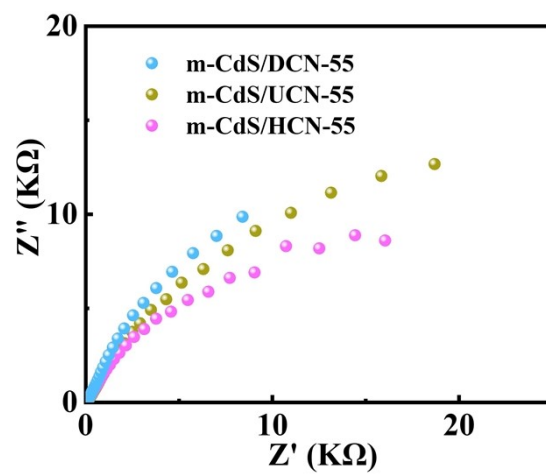

**Fig.S30** EIS Nyquist plots of m-CdS/DCN-55, m-CdS/UCN-55, m-CdS/HCN-55

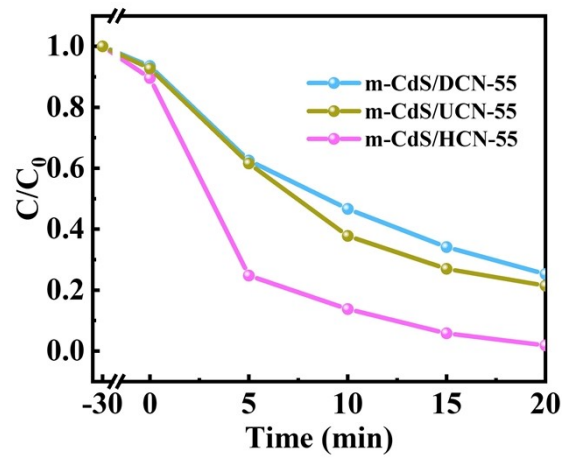

**Fig.S31 Photocatalytic performance of m-CdS/DCN-55, m-CdS/UCN-55 and m-CdS/HCN-55 for TC degradation**



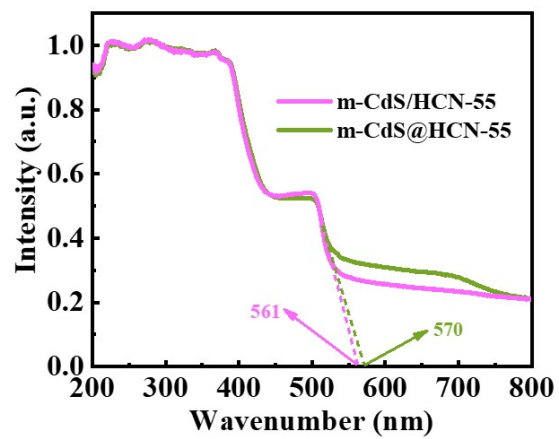

Fig.S32 UV-vis DRS of m-CdS/HCN-55 and m-CdS@HCN-55

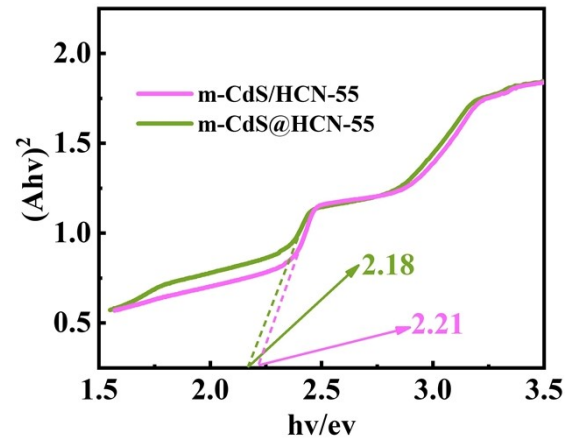

Fig.S33 DRS converted spectra of m-CdS/HCN-55 and m-CdS@HCN-55

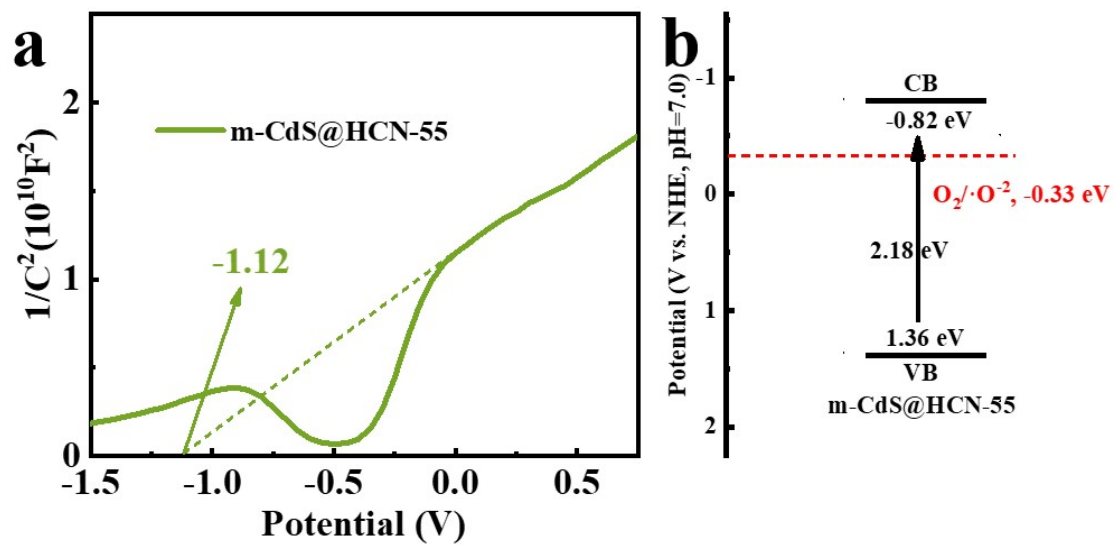

Fig.S34 (a) Mott- Schottky plots and (b) band structure of m-CdS@HCN-55

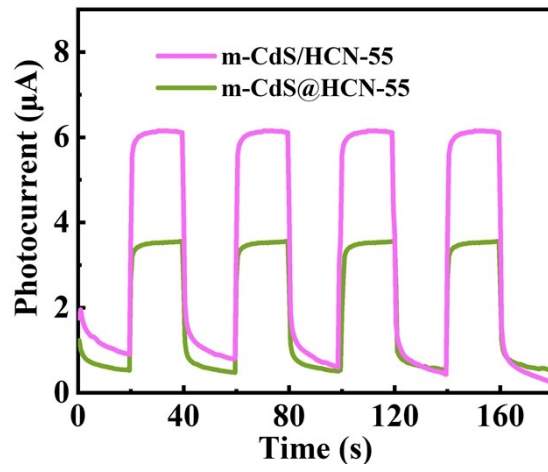

Fig.S35 Transient photocurrent response of m-CdS/HCN-55 and m-CdS@HCN-55

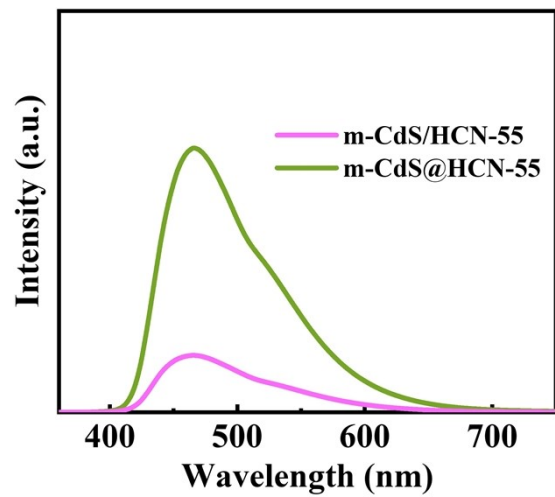

Fig.S36 PL spectra of m-CdS/HCN-55 and m-CdS@HCN-55

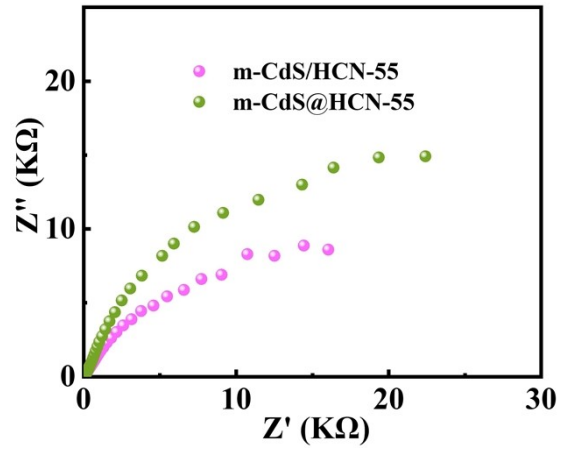

Fig.S37 EIS Nyquist plots of  $m\text{-CdS/HCN-55}$  and  $m\text{-CdS@HCN-55}$

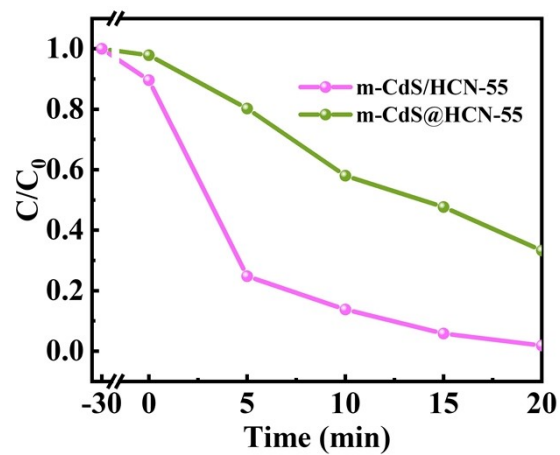

**Fig.S38 Photocatalytic performance of m-CdS/HCN-55 and m-CdS@HCN-55 for TC degradation**

Tab.S1

| Photocatalyst<br>(g·L <sup>-1</sup> )                                                          | Pollutant<br>(mg·L <sup>-1</sup> ) | Removal<br>efficiency | Degradation<br>time<br>(min) | Light<br>source | Refs<br>(year) |
|------------------------------------------------------------------------------------------------|------------------------------------|-----------------------|------------------------------|-----------------|----------------|
| g-<br>C <sub>3</sub> N <sub>4</sub> /Ag <sub>2</sub> CO <sub>3</sub> /graph<br>ene oxide (0.6) | Tetracycline<br>(20)               | 81.6%                 | 60                           | >420<br>nm      | [1]<br>(2019)  |
| g-C <sub>3</sub> N <sub>4</sub> /CdS (0.5)                                                     | Tetracycline<br>(50)               | 69.63%                | 60                           | >300<br>nm      | [2]<br>(2019)  |
| WO <sub>3</sub> /g-C <sub>3</sub> N <sub>4</sub> /Bi <sub>2</sub> O <sub>3</sub><br>(1.0)      | Tetracycline<br>(10)               | 80.2%                 | 60                           | >420<br>nm      | [3]<br>(2018)  |
| g-C <sub>3</sub> N <sub>4</sub> /Au/BiOCl<br>(0.8)                                             | Tetracycline<br>(10)               | 95%                   | 80                           | Vis             | [4]<br>(2018)  |
| g-<br>C <sub>3</sub> N <sub>4</sub> /Bi <sub>2</sub> WO <sub>6</sub> /AgI<br>(0.6)             | Tetracycline<br>(20)               | 91.1%                 | 60                           | >420<br>nm      | [5]<br>(2019)  |
| Carbon<br>dots/MoO <sub>3</sub> /g-C <sub>3</sub> N <sub>4</sub><br>(0.6)                      | Tetracycline<br>(20)               | 88.4%                 | 90                           | >400<br>nm      | [6]<br>(2018)  |
| m-CdS/HCN-55<br>(0.5)                                                                          | Tetracycline<br>(10)               | 98.2%                 | 20                           | >420<br>nm      | This<br>work   |



---

**Tab.S2 pore volume of HCN, m-CdS and m-CdS/HCN-55**

| <b>Samples</b>                                         | <b>HCN</b>   | <b>m-CdS</b> | <b>m-CdS/HCN-55</b> |
|--------------------------------------------------------|--------------|--------------|---------------------|
| <b>Pore volume<br/>(cm<sup>3</sup>·g<sup>-1</sup>)</b> | <b>0.381</b> | <b>0.043</b> | <b>0.757</b>        |

---

**Tab.S3 The kinetic rate constants of catalysts degradation of TC**

| <b>Samples</b>                   | <b>HCN</b>     | <b>m-CdS</b>  | <b>m-CdS/HCN-<br/>35</b> | <b>m-CdS/HCN-<br/>55</b> | <b>m-CdS/HCN-<br/>75</b> |
|----------------------------------|----------------|---------------|--------------------------|--------------------------|--------------------------|
| <b><i>k</i>/min<sup>-1</sup></b> | <b>0.05675</b> | <b>0.0631</b> | <b>0.12829</b>           | <b>0.19195</b>           | <b>0.12031</b>           |

---

**Tab.S4 The kinetic rate constants of catalysts degradation of MO**

| <b>Samples</b>                   | <b>HCN</b>     | <b>m-CdS</b>   | <b>m-CdS/HCN-<br/>35</b> | <b>m-CdS/HCN-<br/>55</b> | <b>m-CdS/HCN-<br/>75</b> |
|----------------------------------|----------------|----------------|--------------------------|--------------------------|--------------------------|
| <b><i>k</i>/min<sup>-1</sup></b> | <b>0.01255</b> | <b>0.00973</b> | <b>0.05768</b>           | <b>0.08194</b>           | <b>0.06287</b>           |

---

## Reference

- [1] H.-Y. Liu, C. Liang, C.-G. Niu, D.-W. Huang, Y.-B. Du, H. Guo, L. Zhang, Y.-Y. Yang, G.-M. Zeng, Facile assembly of g-C<sub>3</sub>N<sub>4</sub>/Ag<sub>2</sub>CO<sub>3</sub>/graphene oxide with a novel dual Z-scheme system for enhanced photocatalytic pollutant degradation, *Applied Surface Science* 475 (2019) 421-434.
- [2] G. Li, B. Wang, J. Zhang, R. Wang, H. Liu, Rational construction of a direct Z-scheme g-C<sub>3</sub>N<sub>4</sub>/CdS photocatalyst with enhanced visible light photocatalytic activity and degradation of erythromycin and tetracycline, *Applied Surface Science* 478 (2019) 1056-1064.
- [3] L. Jiang, X. Yuan, G. Zeng, J. Liang, X. Chen, H. Yu, H. Wang, Z. Wu, J. Zhang, T. Xiong, In-situ synthesis of direct solid-state dual Z-scheme WO<sub>3</sub>/g-C<sub>3</sub>N<sub>4</sub>/Bi<sub>2</sub>O<sub>3</sub> photocatalyst for the degradation of refractory pollutant, *Applied Catalysis B: Environmental* 227 (2018) 376-385.
- [4] S. Zhao, Y. Zhang, Y. Zhou, J. Fang, Y. Wang, C. Zhang, W. Chen, Fabrication of sandwich-structured g-C<sub>3</sub>N<sub>4</sub>/Au/BiOCl Z-scheme photocatalyst with enhanced photocatalytic performance under visible light irradiation, *Journal of Materials Science* 53(8) (2018) 6008-6020.
- [5] W. Xue, D. Huang, J. Li, G. Zeng, R. Deng, Y. Yang, S. Chen, Z. Li, X. Gong, B. Li, Assembly of AgI nanoparticles and ultrathin g-C<sub>3</sub>N<sub>4</sub> nanosheets codecorated Bi<sub>2</sub>WO<sub>6</sub> direct dual Z-scheme photocatalyst: An efficient, sustainable and heterogeneous catalyst with enhanced photocatalytic performance, *Chemical Engineering Journal* 373 (2019) 1144-1157.
- [6] Z. Xie, Y. Feng, F. Wang, D. Chen, Q. Zhang, Y. Zeng, W. Lv, G. Liu, Construction of carbon dots modified MoO<sub>3</sub>/g-C<sub>3</sub>N<sub>4</sub> Z-scheme photocatalyst with enhanced visible-light photocatalytic activity for the degradation of tetracycline, *Applied Catalysis B-Environmental* 229 (2018) 96-104.
