# Supplementary figures and images for: Preparation of miscible CdS and homojunction C3N4 hybrids for efficient photocatalytic degradation of tetracycline
Source: Royal Society of Chemistry journal article supplement (doi:10.1039/d2nj01854c), 2022-01-01

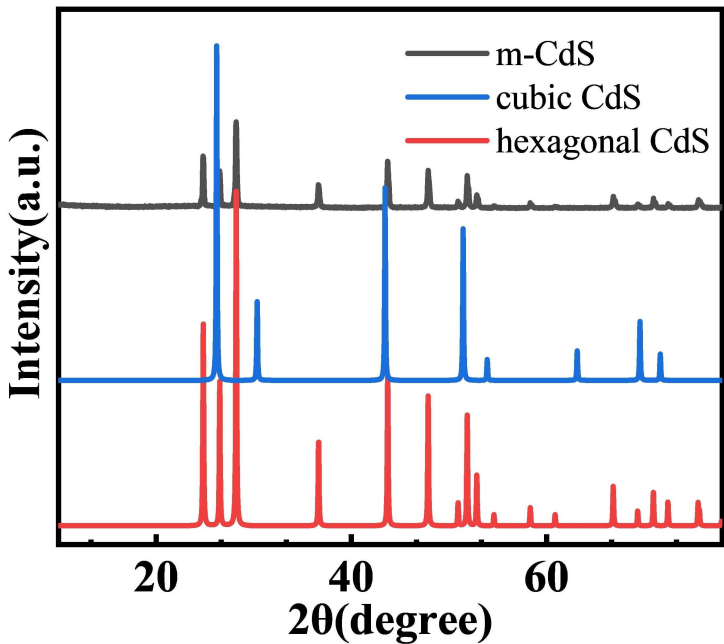

Supplement: d2nj01854c1.pdf [file d2nj01854c1.pdf]

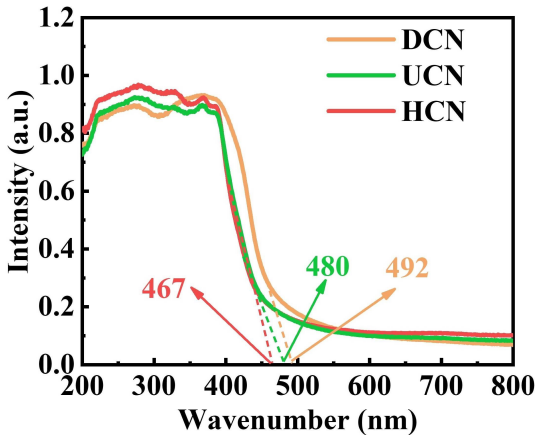

Supplement: d2nj01854c10.pdf [file d2nj01854c10.pdf]

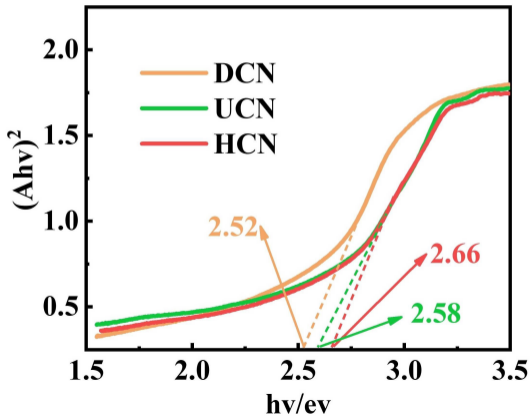

Supplement: d2nj01854c11.pdf [file d2nj01854c11.pdf]

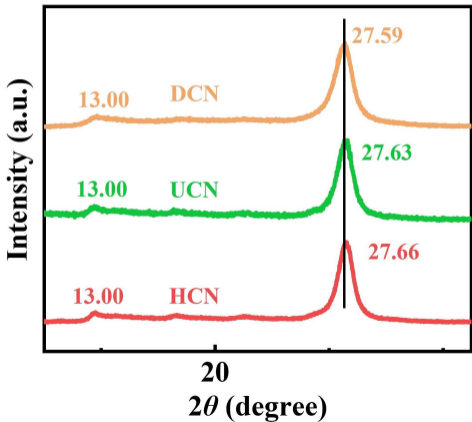

Supplement: d2nj01854c12.pdf [file d2nj01854c12.pdf]

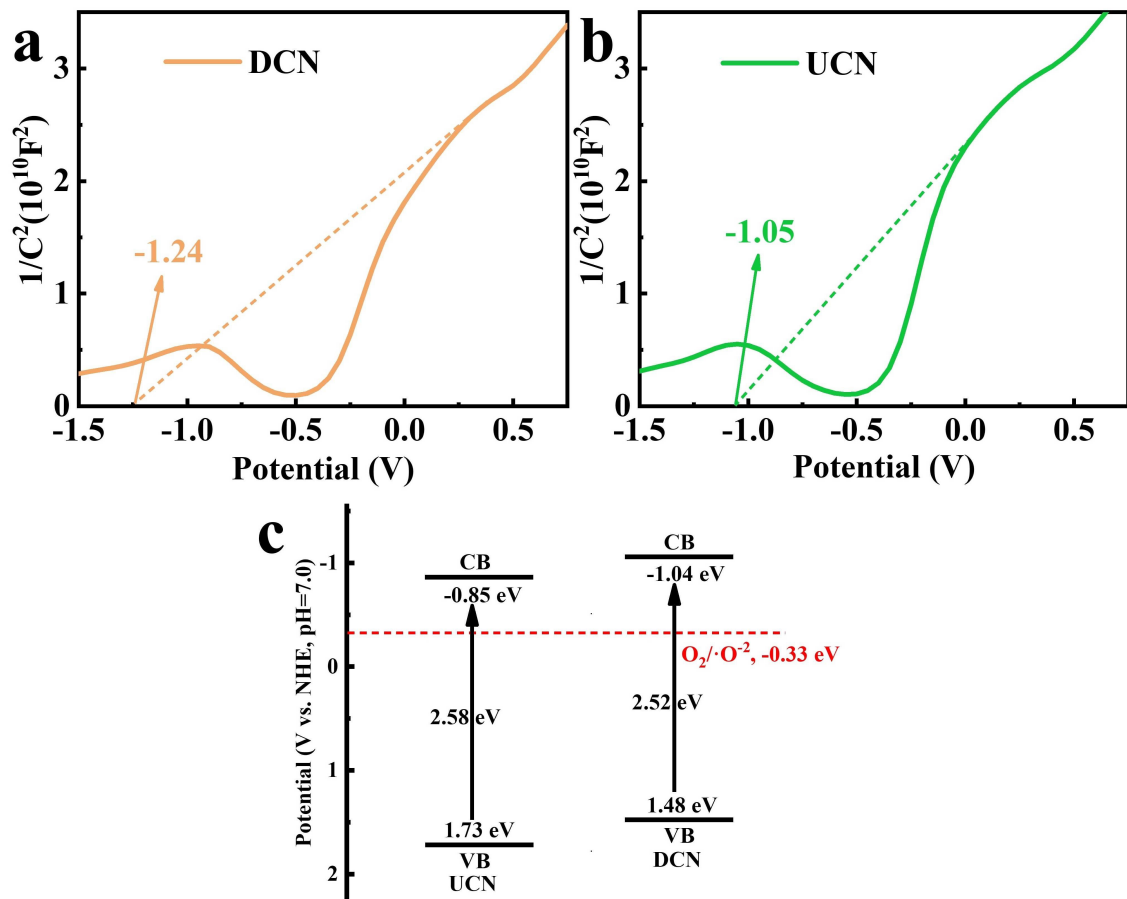

Supplement: d2nj01854c13.pdf [file d2nj01854c13.pdf]

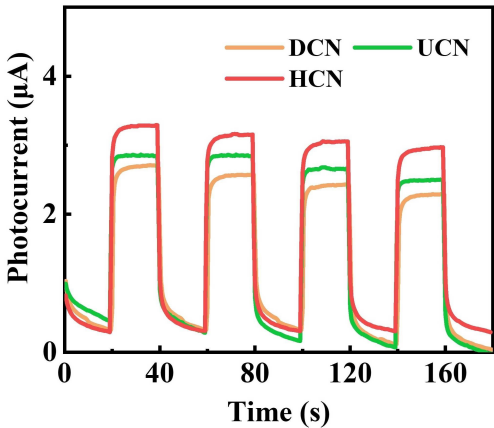

Supplement: d2nj01854c14.pdf [file d2nj01854c14.pdf]

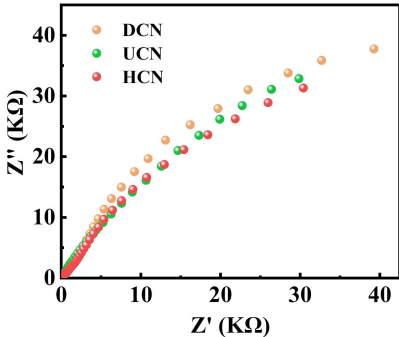

Supplement: d2nj01854c15.pdf [file d2nj01854c15.pdf]

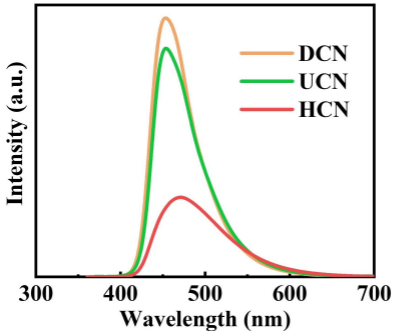

Supplement: d2nj01854c16.pdf [file d2nj01854c16.pdf]

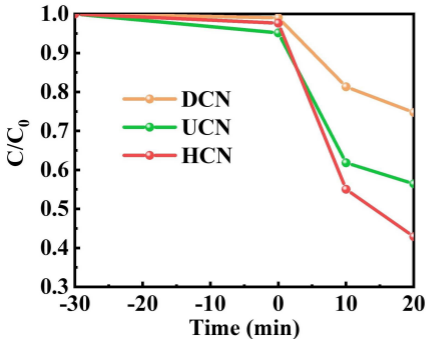

Supplement: d2nj01854c17.pdf [file d2nj01854c17.pdf]

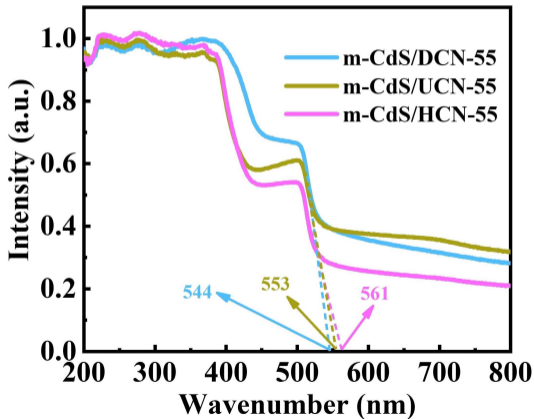

Supplement: d2nj01854c18.pdf [file d2nj01854c18.pdf]

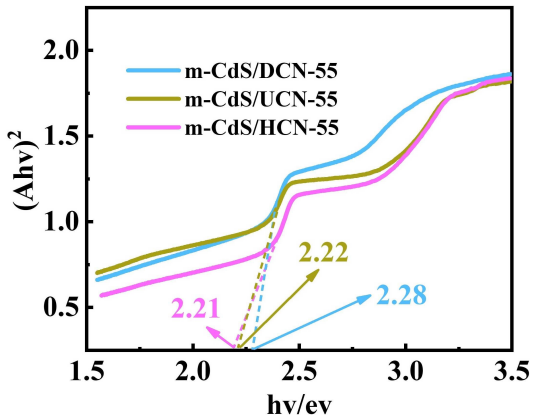

Supplement: d2nj01854c19.pdf [file d2nj01854c19.pdf]

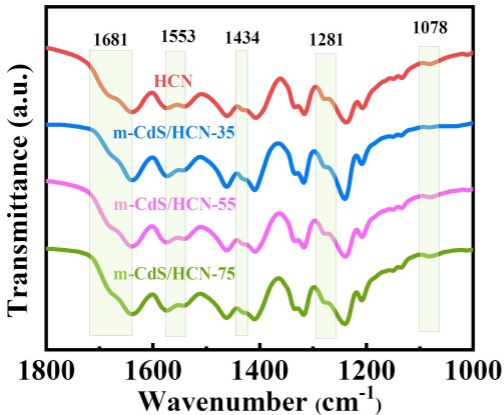

Supplement: d2nj01854c2.pdf [file d2nj01854c2.pdf]

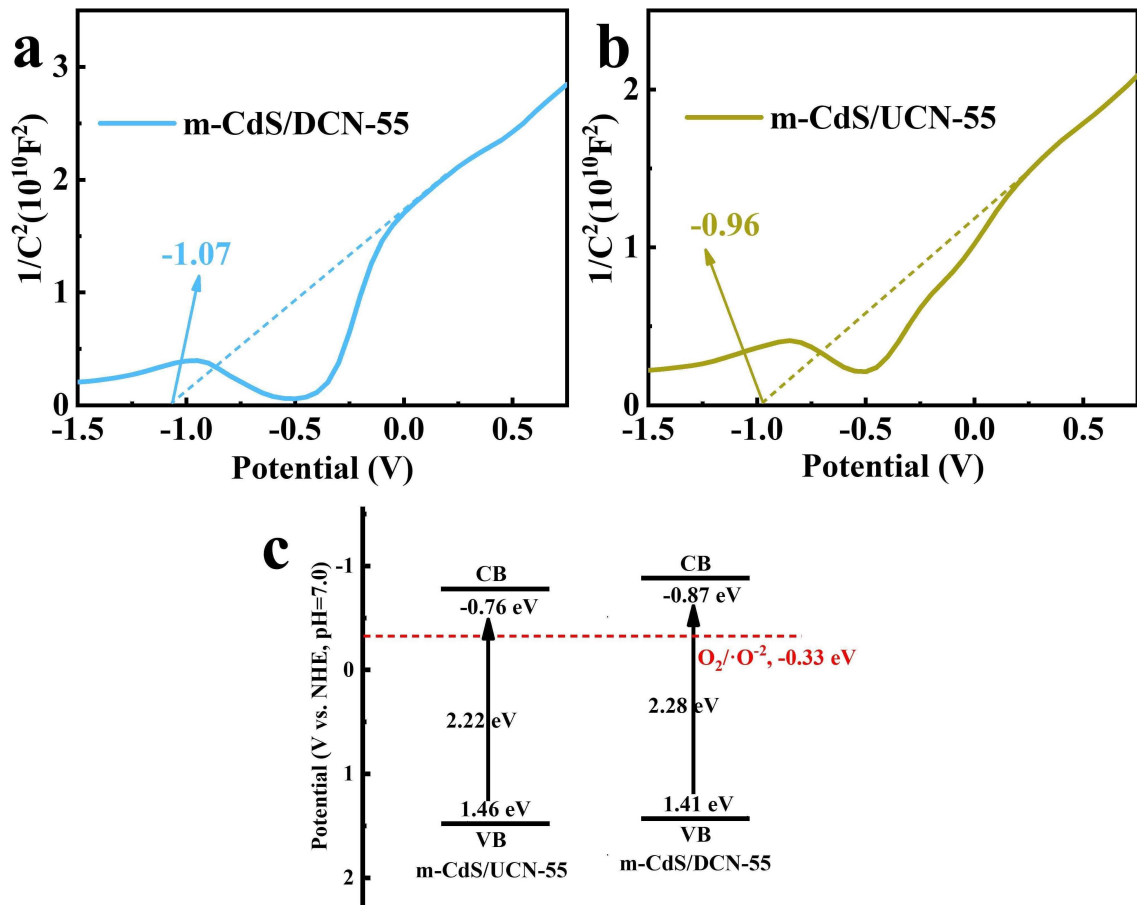

Supplement: d2nj01854c20.pdf [file d2nj01854c20.pdf]

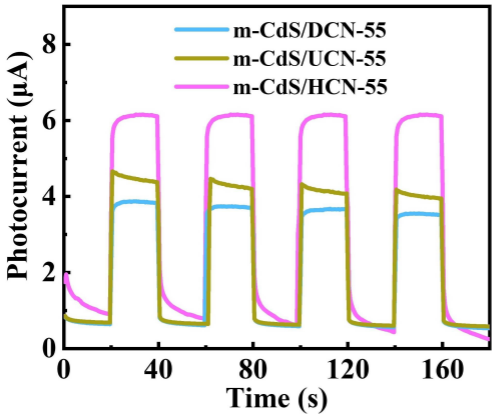

Supplement: d2nj01854c21.pdf [file d2nj01854c21.pdf]

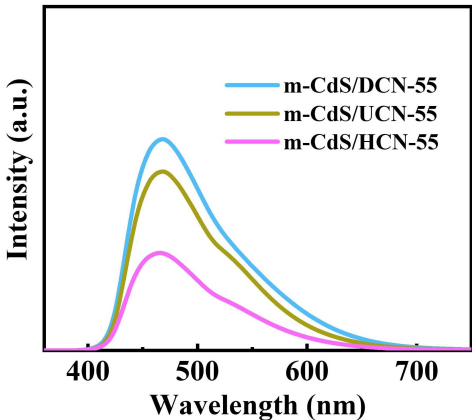

Supplement: d2nj01854c22.pdf [file d2nj01854c22.pdf]

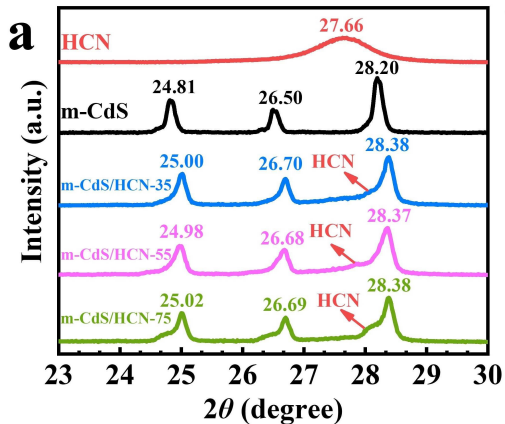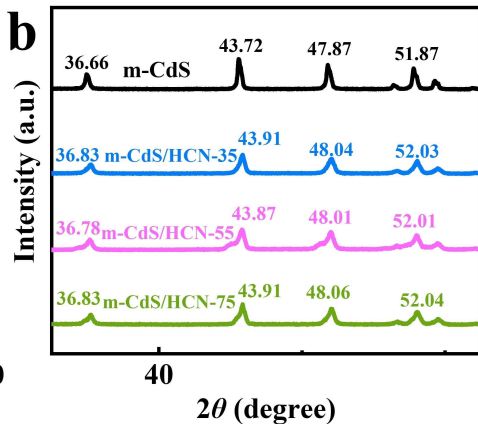

Supplement: d2nj01854c23.pdf [file d2nj01854c23.pdf]

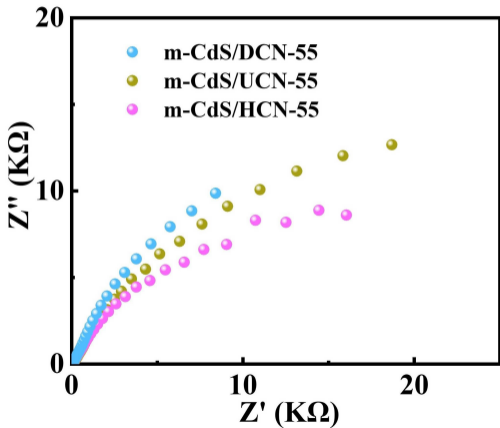

Supplement: d2nj01854c24.pdf [file d2nj01854c24.pdf]

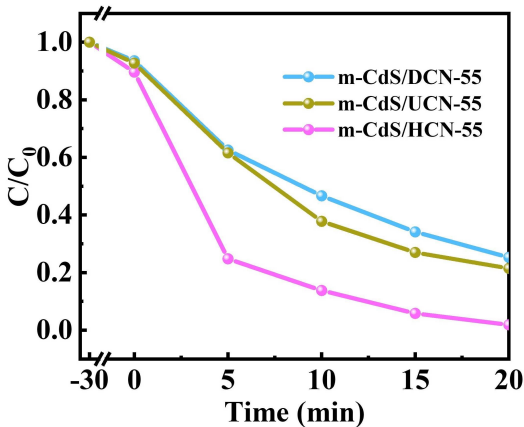

Supplement: d2nj01854c25.pdf [file d2nj01854c25.pdf]

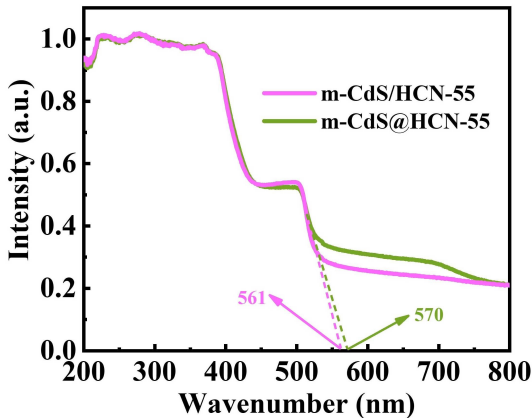

Supplement: d2nj01854c26.pdf [file d2nj01854c26.pdf]

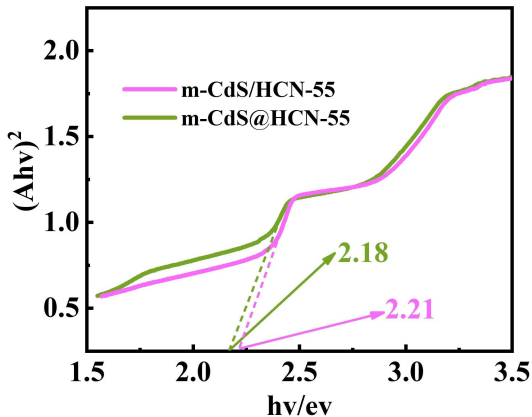

Supplement: d2nj01854c27.pdf [file d2nj01854c27.pdf]

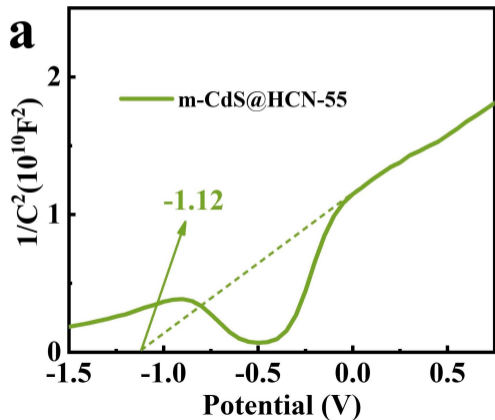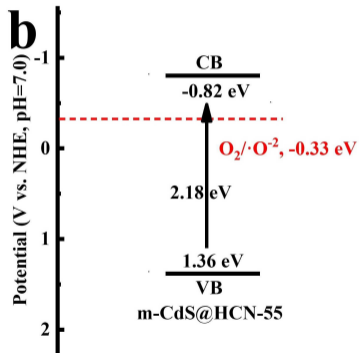

Supplement: d2nj01854c28.pdf [file d2nj01854c28.pdf]

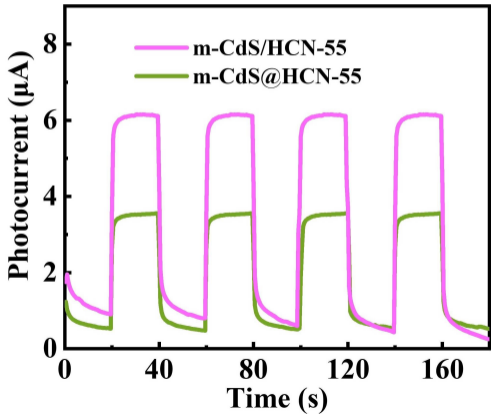

Supplement: d2nj01854c29.pdf [file d2nj01854c29.pdf]

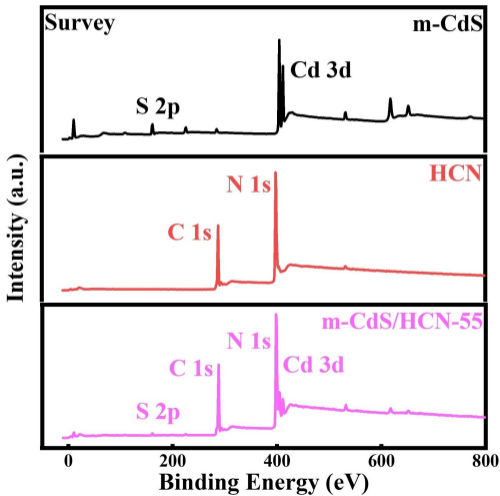

Supplement: d2nj01854c3.pdf [file d2nj01854c3.pdf]

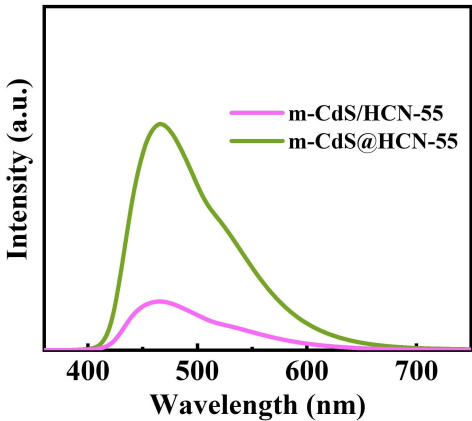

Supplement: d2nj01854c30.pdf [file d2nj01854c30.pdf]

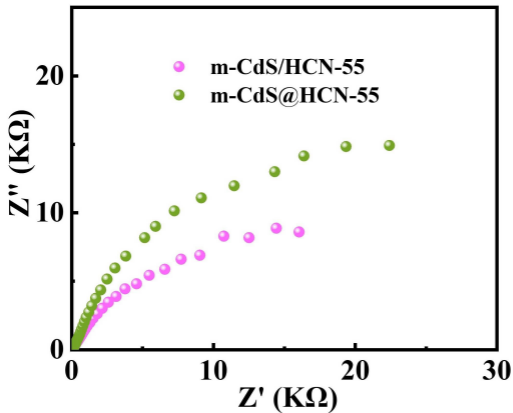

Supplement: d2nj01854c31.pdf [file d2nj01854c31.pdf]

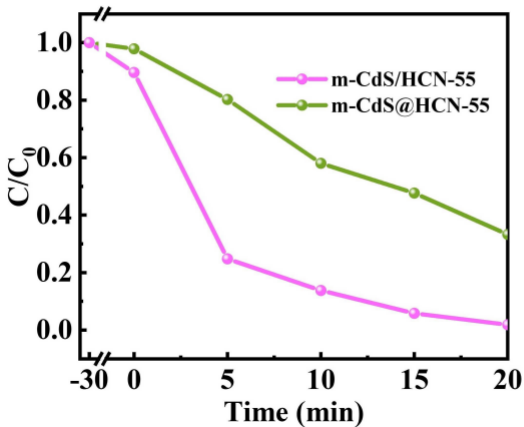

Supplement: d2nj01854c32.pdf [file d2nj01854c32.pdf]

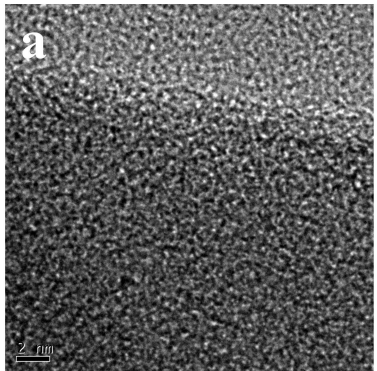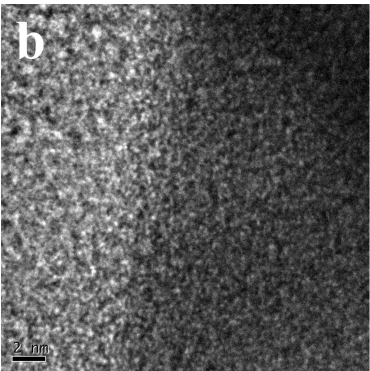

Supplement: d2nj01854c33.pdf [file d2nj01854c33.pdf]

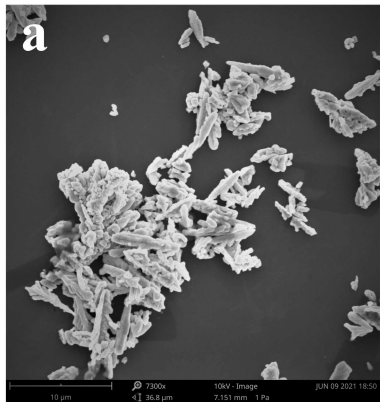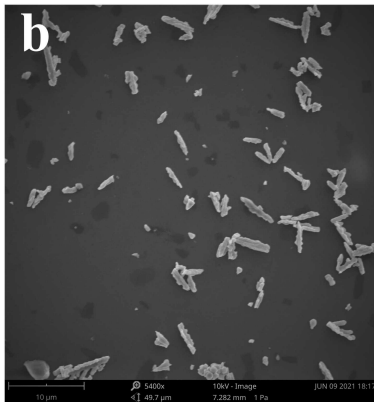

Supplement: d2nj01854c34.pdf [file d2nj01854c34.pdf]

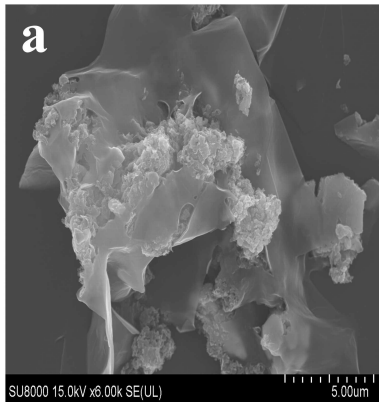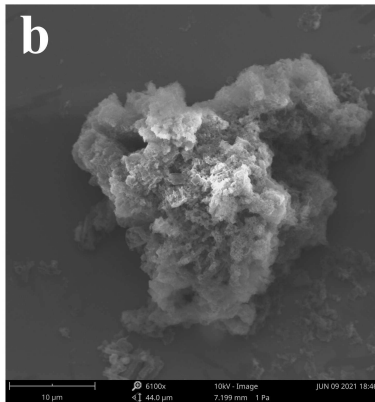

Supplement: d2nj01854c35.pdf [file d2nj01854c35.pdf]

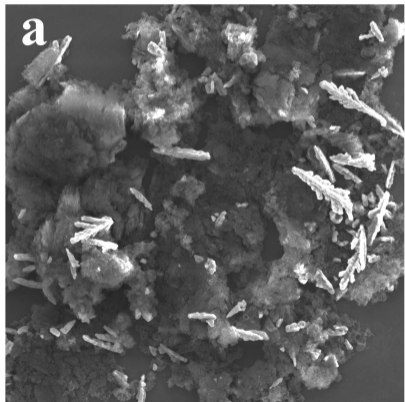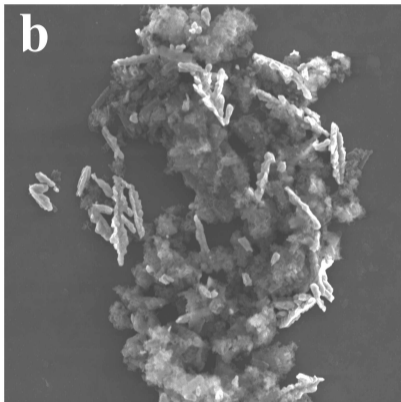

Supplement: d2nj01854c36.pdf [file d2nj01854c36.pdf]

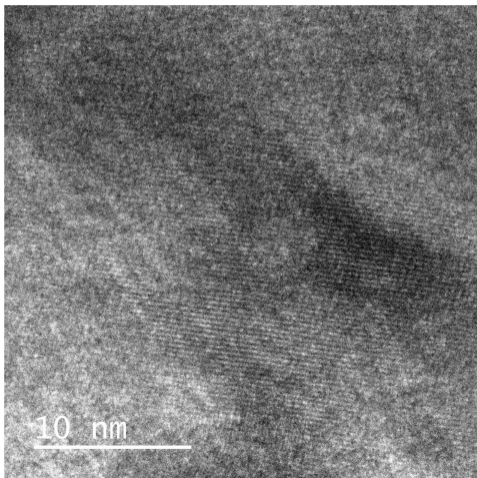

Supplement: d2nj01854c37.pdf [file d2nj01854c37.pdf]

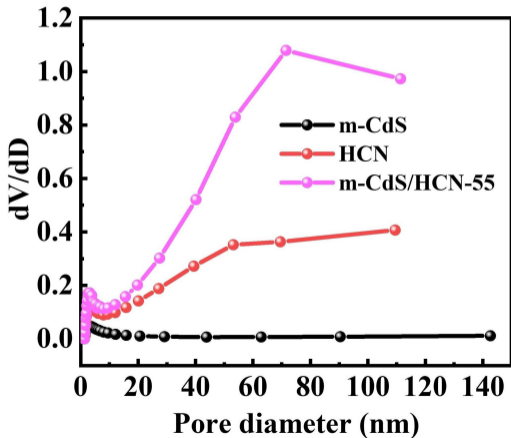

Supplement: d2nj01854c38.pdf [file d2nj01854c38.pdf]

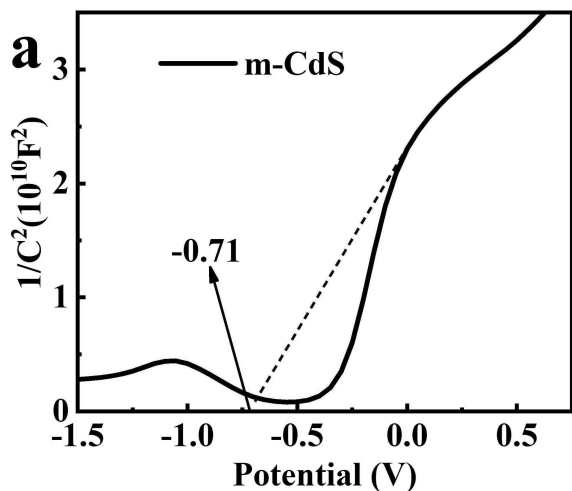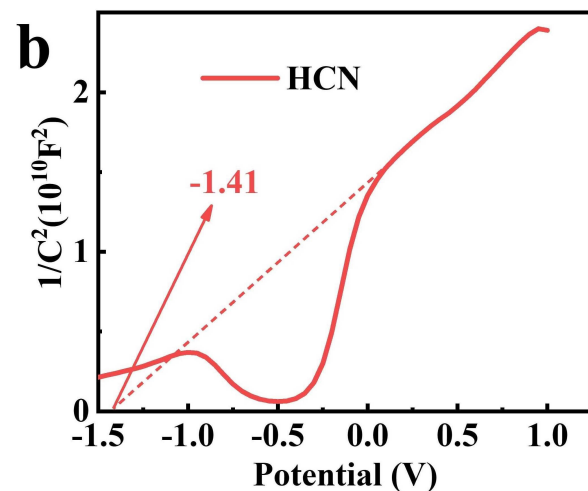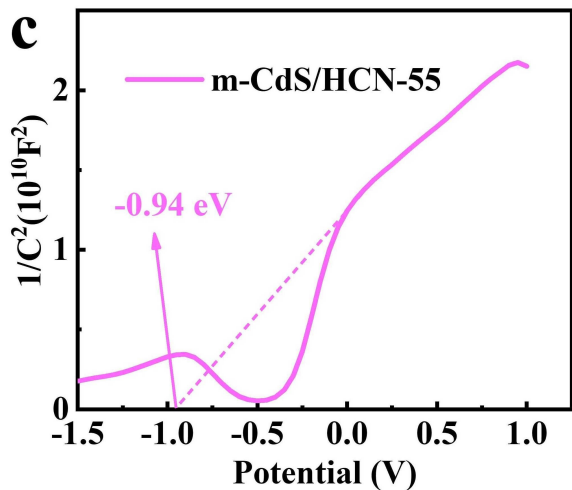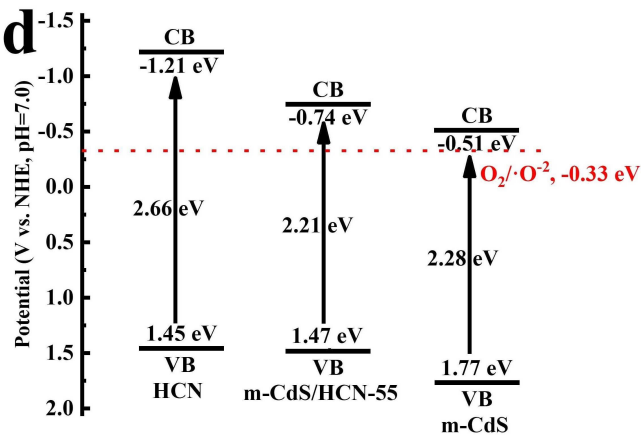

Supplement: d2nj01854c5.pdf [file d2nj01854c5.pdf]

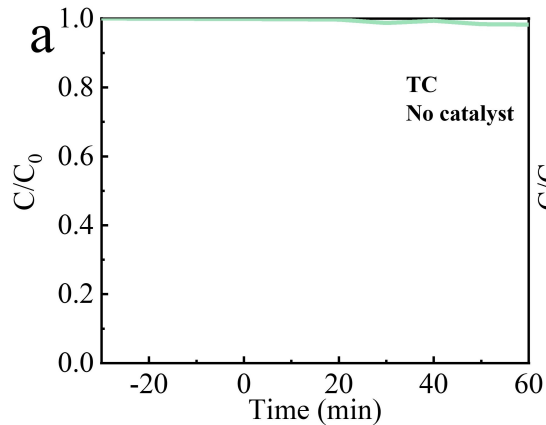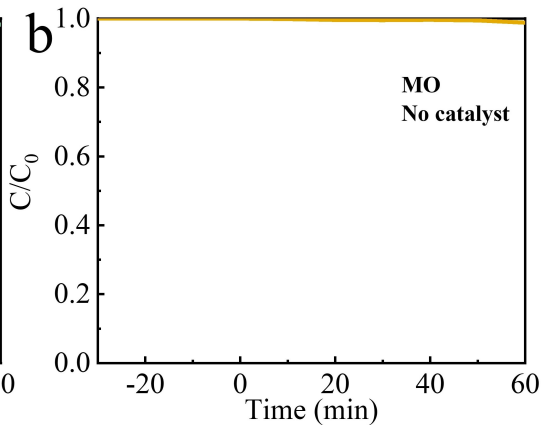

Supplement: d2nj01854c6.pdf [file d2nj01854c6.pdf]

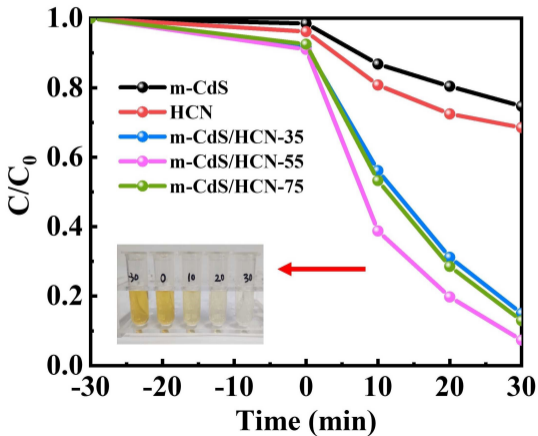

Supplement: d2nj01854c7.pdf [file d2nj01854c7.pdf]

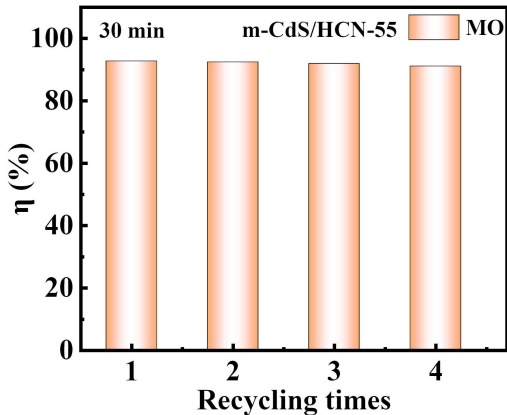

Supplement: d2nj01854c8.pdf [file d2nj01854c8.pdf]

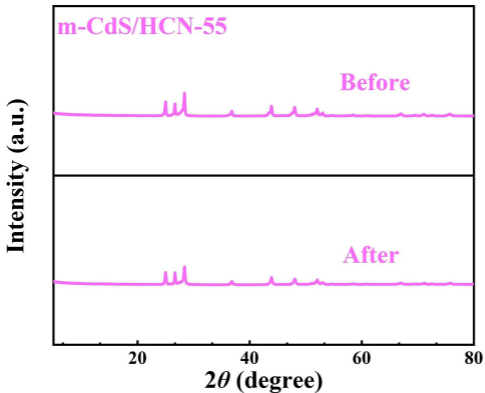

Supplement: d2nj01854c9.pdf [file d2nj01854c9.pdf]
